# Supplementary material for: Cytokinin-Regulated Expression of Arabidopsis thaliana PAP Genes and Its Implication for the Expression of Chloroplast-Encoded Genes
Source: PubMed Central journal article supplement (PMC7764210; doi:10.3390/biom10121658), 2020-12-11
Supplement: biomolecules-10-01658-s001.pdf [file biomolecules-10-01658-s001.pdf]

# Cytokinin-regulated Expression of *Arabidopsis thaliana* PAP Genes and its Implication for the Expression of Chloroplast-encoded Genes

Aleksandra A. Andreeva <sup>1</sup>, Radomira Vankova <sup>2</sup>, Ivan A. Bychkov <sup>1</sup>, Natalia V. Kudryakova <sup>1,\*</sup>, Maria N. Danilova <sup>1</sup>, Jozef Lacek <sup>2</sup>, Elena S. Pojidaeva<sup>1</sup>, Victor V. Kusnetsov <sup>1</sup>

<sup>1</sup> Timiryazev Institute of Plant Physiology, Russian Academy of Sciences, Botanicheskaya 35, Moscow, 127276, Russia

<sup>2</sup> Institute of Experimental Botany, Academy of Sciences CR, Rozvojova 263, 165 02 Prague 6, Czech Republic

Correspondence: nvkudryakova@mail.ru; Tel.: + 7 (499) 678-54-00

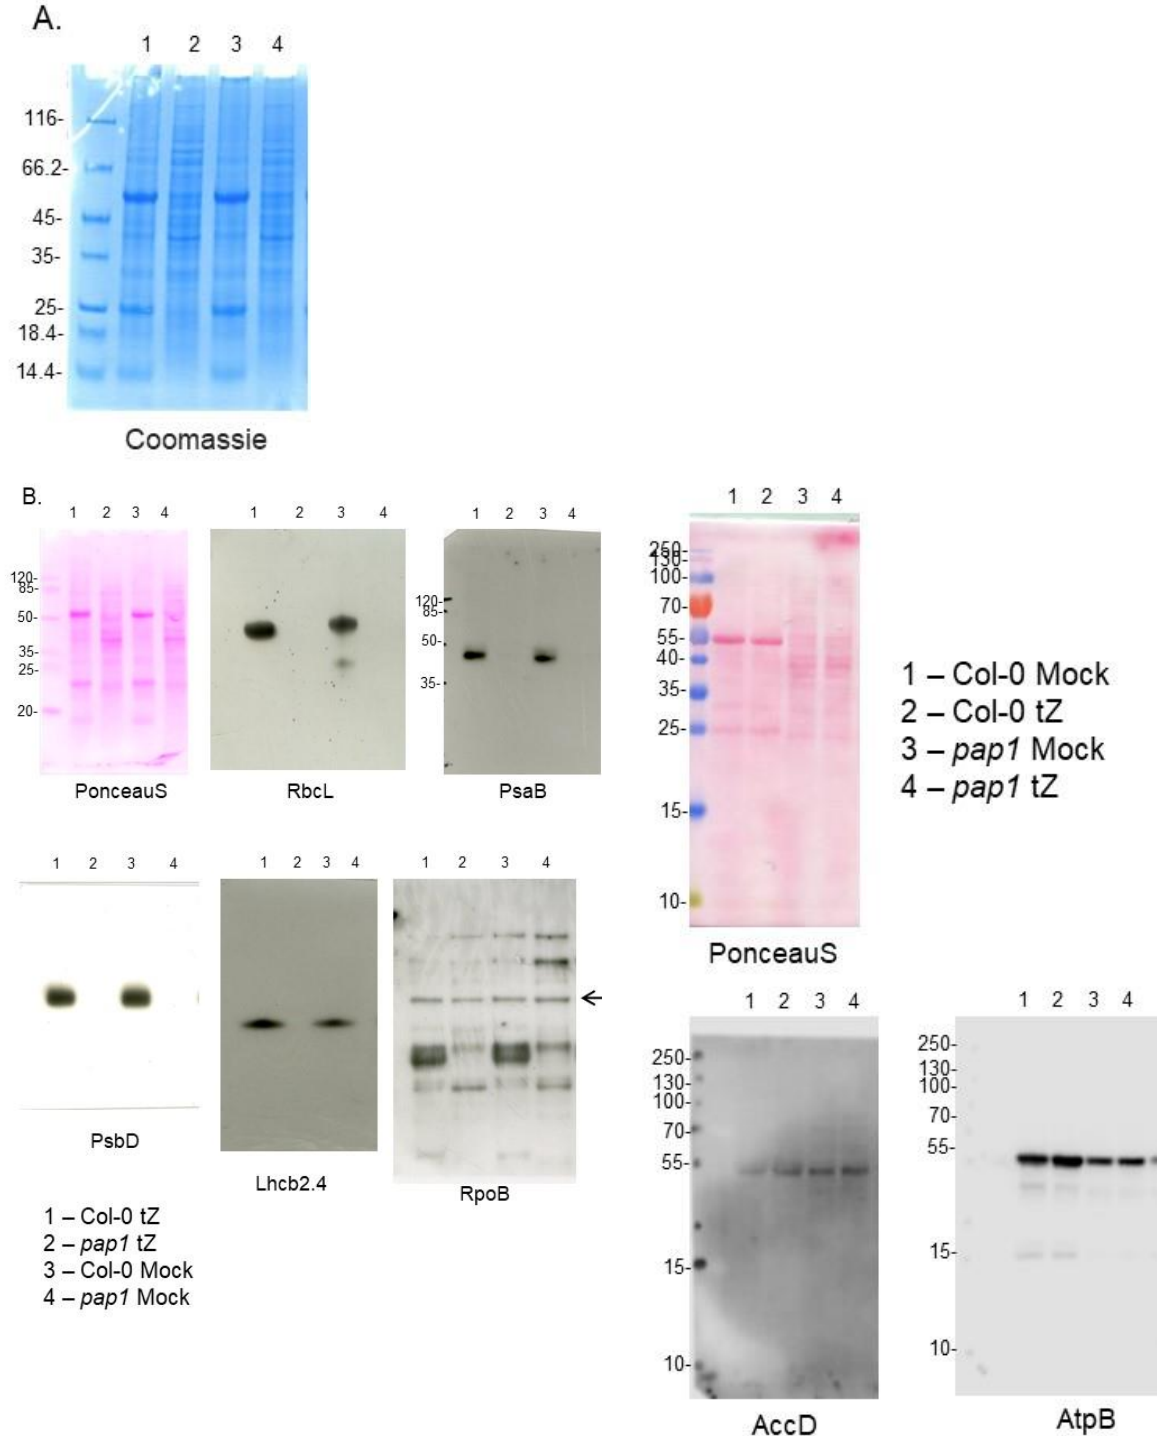

**Figure S1.** Immunoblot analysis of the photosynthetic proteins on the basis of equal total Ponceau S dye stained blot with proteins from leaves of wild type plants and *pap1* mutant grown on MS medium in Petri dishes for four weeks under a 16 h light/8 h dark photoperiod at 23 °C with 100  $\mu\text{E m}^{-2} \text{s}^{-1}$ . Proteins were visualized by immunoblotting using antibodies specific for RbcL, PsaB, PsbD, AtpB, RpoB, AccD and Lhcb2.4 proteins.

**Table S1.** Primers sequences used in this study for qRT-PCR

| Gene (Locus)              | Forward/Reverse | Sequence (5'–3')                  |
|---------------------------|-----------------|-----------------------------------|
| <i>PAP1</i> (AT3G04260)   | Forward         | TGAGAGTGGTGGAGAGATTACGGAA         |
|                           | Reverse         | CCATCTTGCTTGCTGCTTTTCG            |
| <i>PAP2</i> (AT1G74850)   | Forward         | CGGGGACAGTTGGAGAAAAGC             |
|                           | Reverse         | GACCTCCATTCCATCCCGTGA             |
| <i>PAP3</i> (AT3G48500)   | Forward         | GGAAAGGCAATGTGTGGTATGA            |
|                           | Reverse         | AAGAGGTTGCTGTTCCGAGTAA            |
| <i>PAP4</i> (AT5G23310)   | Forward         | ATCAAGGCTACATACAACAACGGGA         |
|                           | Reverse         | AACCAAAAATCCTTATCAATCTGCTCAA      |
| <i>PAP5</i> (AT2G34640)   | Forward         | ATGCGGTTATGGATTTTCAGAG            |
|                           | Reverse         | TTCCTTTTTGTCAGTAGTGCTTCAT         |
| <i>PAP6</i> (AT3G54090)   | Forward         | GGCGGAGACTGTGAAAGAACCA            |
|                           | Reverse         | GTATTGCCGTAAAAAGAGTTGATTGC        |
| <i>PAP7</i> (AT4G20130)   | Forward         | TATGGGCGGTTAGTATGGCACAG           |
|                           | Reverse         | CAGCATTGACATAACCTCCAGCA           |
| <i>PAP8</i> (AT1G21600)   | Forward         | CACTGAACCACCTATTGATGCCC           |
|                           | Reverse         | GAACTCTGGCTCTGGTGATTGACTT         |
| <i>PAP9</i> (AT5G51100)   | Forward         | GCAGTAAATCCGCTCGTATGGG            |
|                           | Reverse         | CATCTTCTGTCTCTGTTCTTCTTGTCT       |
| <i>PAP10</i> (AT3G06730)  | Forward         | AGGTGCCGTTGATTGTTGAT              |
|                           | Reverse         | GGACTGATGAAGAATAATGTAGGTAAC       |
| <i>PAP11</i> (AT1G63680)  | Forward         | CGTTGTGCTGTTGCTATGGGTG            |
|                           | Reverse         | TGCTTCCCGACATTCCTCTCTG            |
| <i>PAP12</i> (AT5G24314)  | Forward         | AGAGAGATGATAATGGACGCCG            |
|                           | Reverse         | TGTCATTACCTTCCCAACTTCTCTT         |
| <i>ARR5</i> (AT3G48100)   | Forward         | CTA CTC GCA GCT AAA ACG C         |
|                           | Reverse         | GCC GAA AGA ATC AGG ACA           |
| <i>RpoTp</i> (AT2G24120)  | Forward         | TTG CTG CTG CTT GCT ATT CTG C     |
|                           | Reverse         | GCA CAA TCA CCA AGC CAA CT        |
| <i>RpoTmp</i> (AT5G15700) | Forward         | CGT TTC CTC ATT TAG ACT TTC CTC C |
|                           | Reverse         | CCT TCT CTC TGT CTG CGT CTC TGT   |
| <i>AHK2</i> (AT5G35750)   | Forward         | GGG GAT ATA AGT GAG CAG CAT ATA A |
|                           | Reverse         | TGT CCA GGG AAT GGG AAG TT        |
| <i>AHK3</i> (AT1G27320)   | Forward         | GCA TCG GAG CTT TGA ACC AT        |
|                           | Reverse         | GGA TAT GGA TGG TCC GAC TTG       |
| <i>AHK4</i> (AT2G01830)   | Forward         | ATT CTA GCG ATG ACT GCG GA        |
|                           | Reverse         | CGA CGA AGG TGA GAT AGG ATT       |
| <i>ARR1</i> (AT3G16857)   | Forward         | ACA ACG GAA TGC TGA TGC CTC T     |
|                           | Reverse         | CAC TCT GCT GCT CTC GGG GAT       |
| <i>ARR10</i> (AT4G31920)  | Forward         | AGT GGT TTG ATG GCT TCT GAT GC    |

|                         |         |                                 |
|-------------------------|---------|---------------------------------|
|                         | Reverse | AAA TCC CAA TCA CCT TCC GAG A   |
| ARR12 (AT2G25180)       | Forward | GTT TCC ATC ACC GCC CAA TC      |
|                         | Reverse | CCG AAG GAG TAT TGA GTC TGC CA  |
| SIG2 (AT1G08540)        | Forward | TCT TCT TCG TCT TCA TCA TCC GC  |
|                         | Reverse | CTG CTG CTG CTA CAA CTA CTG CTT |
| SIG5 (AT5G24120)        | Forward | AGA TGT TGA TGG TGT TGG AGC     |
|                         | Reverse | GAC TCT CTT TCG GCT TCA ATG     |
| SIG6 (AT2G36990)        | Forward | TCG CCT ATT GTT GGT TCG C       |
|                         | Reverse | GGG CTG ATA ATG ATG ATG CG      |
| <i>psbA</i> (ArthCp002) | Forward | CGG TGC CAT TAT TCC TAC TTC T   |
|                         | Reverse | CTT GCC CGA ATC TGT AAC CT      |
| <i>psbD</i> (ArthCp017) | Forward | GGA TGA CTG GTT ACG GAG GG      |
|                         | Reverse | GGT TGT ACC TGT GAA CCA ACC     |
| <i>rbcL</i> (ArthCp030) | Forward | CGG GTA CAT GCG AAG AAA TGA     |
|                         | Reverse | TCT CGG TCA AAG CAG GCA TA      |
| LHCB2.4 (AT3G27690)     | Forward | CCA ACG ATC TCC TCC GCA AA      |
|                         | Reverse | AGA CTT GAC GGT ACG ACG CA      |
| <i>atpB</i> (AtCg00480) | Forward | CTA TGA GTG CGA CAG AGG GT      |
|                         | Reverse | GAT AGG AGA TGT TGT GCG AG      |
| <i>clpP</i> (ArthCp048) | Forward | CAT TCC AGA TAT TAC CCA TCC A   |
|                         | Reverse | GCC AAG AGG TIG ATA CCG AA      |
| <i>rpoA</i> (ArthCp055) | Forward | CGC CAA GTA AAG CTC TTC GC      |
|                         | Reverse | AAG GCC AAG CCG ACA CAA TA      |
| <i>rpoB</i> (ArthCp014) | Forward | ATG AGC AAC ACC AAA CCC CT      |
|                         | Reverse | GGG TAG GCG AAA TGG AGG TT      |
| <i>accD</i> (ArthCp031) | Forward | GCT ACC AAT CAA TGT TTA CCT C   |
|                         | Reverse | GAT TGA TAA TCA CAT AAA ACC G   |
| GNL (AT4G26150)         | Forward | CCA TAT CTC CCA ACC TCT CG      |
|                         | Reverse | TGG GCA CCA TTT GAT CAC T       |
| GNC (AT5G56860)         | Forward | GCG TGA TTA GGG TTT GTT CG      |
|                         | Reverse | CTT TGC CGT ATA CCA CAT GC      |
| GLK1 (At2g20570)        | Forward | CCG GTA GAC TTA CAT CCG TCA     |
|                         | Reverse | CAT GGC CTC GTC AAT ACA TCT     |
| GLK2 (AT5G44190)        | Forward | AAC GTT GCT AGC CAT CTT CAG     |
|                         | Reverse | CTC CTA CTC CGG GCA CTG         |
| CRF6 (AT3G61630)        | Forward | GACGAACGAGACGAGTGAAGT           |
|                         | Reverse | ACGAGTCAGTAGCGAAAGGAT           |
| HY5 (AT5G11260)         | Forward | CCA TCA AGC AGC GAG AGG TCA T   |
|                         | Reverse | CGC CGA TCC AGA TTC TCT ACC G   |
| CKX3 (AT5G56970)        | Forward | TCT CAA TAC ACA GTC AAC GAG GA  |
|                         | Reverse | TCG TAC ATA AAC CCT CTT ACA TGG |
| CKX5 (AT1G75450)        | Forward | CCA TGG TCC TCA AAT TAG TAA CG  |

|                  |         |                               |
|------------------|---------|-------------------------------|
|                  | Reverse | TCT GAG CAT CTC ATC ACC TCT C |
| IPT3 (AT3G63110) | Forward | AGT GGA ATG GTT GAG GAA GTC   |
|                  | Reverse | CAA GAA CTG CTC GTT CCT GA    |
| IPT5 (AT5G19040) | Forward | AGT TAC AGC GAT GAC CAC CA    |
|                  | Reverse | GGC AGA GAT CTC CGG TAG G     |
| CKA4 (AT2G23070) | Forward | TCT TTT ATG GCC ATG ACA ACT   |
|                  | Reverse | CTG TTG GCC TTT CTT GGT       |

**Table S2.** List of CK-related transcription factors identified in promoters of *Pap* genes using AthaMap server

| Gene  | Factor | Family | Core binding motif |
|-------|--------|--------|--------------------|
| Pap1  | ARR11  | ARR-B  | AGAT               |
|       | ARR14  | ARR-B  | AGAT               |
|       | GNC    | GATA   | GATC               |
|       | GLK1   | GARP   | CCAATC             |
|       | HY5    | bZIP   | ACGT               |
| PAP2  | ARR10  | ARR-B  | AGAT               |
|       | ARR11  | ARR-B  | AGAT               |
|       | ARR14  | ARR-B  | AGAT               |
|       | GLK1   | GARP   | CCAATC             |
| PAP3  | ARR10  | ARR-B  | AGAT               |
|       | ARR11  | ARR-B  | AGAT               |
|       | ARR14  | ARR-B  | AGAT               |
|       | GLK 1  | GARP   | CCAATC             |
| PAP4  | ARR11  | ARR-B  | AGAT               |
|       | ARR14  | ARR-B  | AGAT               |
|       | GLK1   | GARP   | CCAATC             |
| PAP5  | ARR11  | ARR-B  | AGAT               |
|       | ARR14  | ARR-B  | AGAT               |
|       | GLK1   | GARP   | CCAATC             |
| PAP6  | ARR11  | ARR-B  | AGAT               |
|       | ARR14  | ARR-B  | AGAT               |
|       | GLK1   | GARP   | CCAATC             |
| PAP7  | ARR11  | ARR-B  | AGAT               |
|       | ARR14  | ARR-B  | AGAT               |
|       | GLK1   | GARP   | CCAATC             |
| PAP8  | ARR10  | ARR-B  | AGAT               |
|       | ARR11  | ARR-B  | AGAT               |
|       | ARR14  | ARR-B  | AGAT               |
|       | GLK1   | GARP   | CCAATC             |
| PAP9  | ARR10  | ARR-B  | AGAT               |
|       | ARR11  | ARR-B  | AGAT               |
|       | GLK1   | GARP   | CCAATC             |
| PAP10 | ARR11  | ARR-B  | AGAT               |
|       | ARR14  | ARR-B  | AGAT               |
|       | GLK1   | GARP   | CCAATC             |
| PAP11 | ARR1   | ARR-B  | AGAT               |
|       | ARR10  | ARR-B  | AGAT               |
|       | ARR11  | ARR-B  | AGAT               |
|       | GLK1   | GARP   | CCAATC             |
| PAP12 | ARR11  | ARR-B  | AGAT               |
|       | ARR14  | ARR-B  | AGAT               |
|       | GLK 1  | GARP   | CCAATC             |
